# Supplementary material for: Multitargeting the Action of 5-HT6 Serotonin Receptor Ligands by Additional Modulation of Kinases in the Search for a New Therapy for Alzheimer’s Disease: Can It Work from a Molecular Point of View?
Source: MDPI journal article supplement (doi:10.3390/ijms23158768), 2022-08-07
Supplement: s1 [file s1]

## Supplementary

### Multitargeting the Action of 5-HT<sub>6</sub> Serotonin Receptor Ligands by Additional Modulation of Kinases in the Search for a New Therapy for Alzheimer's Disease: Can It Work from a Molecular Point of View?

Kinga Czarnota-Łydka, Katarzyna Kucwaj-Brysz, Patryk Pyka, Wawrzyniec Haberek, Sabina Podlewska\* and Jadwiga Handzlik\*

**Table S1.** MARK4 inhibitors described in literature

| Cpd | Structure                                                                           | SMILES                                                                            | MARK4 inhibition      |             |              |         | FA   |
|-----|-------------------------------------------------------------------------------------|-----------------------------------------------------------------------------------|-----------------------|-------------|--------------|---------|------|
|     |                                                                                     |                                                                                   | IC <sub>50</sub> (μM) | %<br>(1 μM) | %<br>(10 μM) | Kd (μM) |      |
| S1  | 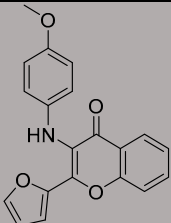   | <chem>O=C1C(NC2=CC=C(OC)C=C2)=C(C3=CC=CO3)OC4=C1C=CC=C4</chem>                    | 5560                  |             |              |         | 2.26 |
| S2  |   | <chem>O=C1C(NC2=CC=C([N+](=O)[O-])=O)C=C2)=C(C3=CC=CO3)OC4=C1C=C(Cl)C=C4Cl</chem> | 2120                  |             |              |         | 2.67 |
| S3  |  | <chem>O=C1C(NC2=CC=C(I)C=C2)=C(C3=CC=CO3)OC4=C1C=C(Cl)C=C4Cl</chem>               | 1980                  |             |              |         | 2.7  |

|     |                                                                                     |                                                                                                |      |  |     |       |      |
|-----|-------------------------------------------------------------------------------------|------------------------------------------------------------------------------------------------|------|--|-----|-------|------|
| S4  | 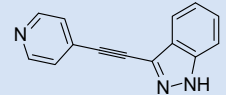   | <chem>C1(C#CC3=CC=NC=C3)=NNC2=C1C=CC=C2</chem>                                                 |      |  | >50 |       | 5    |
| S5  |    | <chem>CCN(C(OC1=CC=CC([C@@H](N(C)C)C)=C1)=O)C</chem>                                           | 6.94 |  |     |       | 5.16 |
| S6  |    | <chem>O=S(C1=CC(F)=CC=C1F)(NC2=CC=C(OC4=C3C=C(OC)C(OCCCN5CCN(C)C5)=CC3=NC=C4)C(F)=C2)=O</chem> |      |  |     | 5.975 | 5.22 |
| S7  |    | <chem>CC(N=C(N)S1)=C1C2=CS(C(N)=N)S=C2N</chem>                                                 |      |  | 83  |       | 5.22 |
| S8  |    | <chem>O=C1C(CC2=CC(OC)=C(OC)C=C2)CC3CCN(CC3)CC4=CC=CC=C4</chem>                                | 5.3  |  |     |       | 5.28 |
| S9  |    | <chem>O=C(NC2=CC=C(C)C=C2)CN(C4=C3C=CC=C4)C1=CC=C(C)C=C1C3=O</chem>                            | 4.5  |  |     |       | 5.35 |
| S10 |   | <chem>O=C(NCC2=CC=C(OC)C=C2)CN(C4=C3C=CC=C4)C1=CC=C(C)C=C1C3=O</chem>                          | 2.20 |  |     |       | 5.66 |
| S11 |  | <chem>O=C1OC2=C(OC)C=CC=C2C=C1C(C3=CC=CC=C3)=O</chem>                                          | 2.09 |  |     |       | 5.68 |
| S12 |  | <chem>O=C(NCC2=CC=CC=C2)CN(C4=C3C=CC=C4)C1=CC=C(C)C=C1C3=O</chem>                              | 1.8  |  |     |       | 5.75 |

|     |                                                                                     |                                                                                  |       |     |  |  |      |
|-----|-------------------------------------------------------------------------------------|----------------------------------------------------------------------------------|-------|-----|--|--|------|
| S13 | 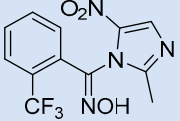   | <chem>CC1=NC=C([N+])([O-])=O)N1C(C2=C(C(F)(F)F)C=CC=C2)=NO</chem>                | 1.74  |     |  |  | 5.76 |
| S14 |    | <chem>O=C(C1=CN(CC2=CC=C(OC)C=C2)N=N1)N/N=C3C(NC4=C/C3=CC=C4C)=O</chem>          | 1.54  |     |  |  | 5.81 |
| S15 |    | <chem>O=C1OC2=CC=C(OC)C=C2C=C1C(C3=CC=CC=C3)=O</chem>                            | 1.3   |     |  |  | 5.89 |
| S16 |    | <chem>CN(N=C1)C=C1NC2=NC=CC(N3CC(CN(C(C4C(F)(F)C4)=O)C5)CCC5C3)=N2</chem>        |       | 59% |  |  | 6.07 |
| S17 |    | <chem>C1(NC2=CC=CC(CN4CCOCC4)=C2)=NC=C(C5CC5)C(NCCC3=CN=C(N3)=N1</chem>          | 0.808 |     |  |  | 6.09 |
| S18 |   | <chem>O=C(C1(C)C)N([C@]2([H])C(C=CC=C3)=C3CC2)C4=C1C=NC(NC5=CN=CC=C5)=N4</chem>  | 0.520 |     |  |  | 6.28 |
| S19 |  | <chem>O=C(C1(C)C)N([C@]2([H])C(C=CC=C3N)=C3CC2)C4=C1C=NC(NC5=CC=CC=C5)=N4</chem> | 0.450 |     |  |  | 6.35 |

|     |  |                                                                                            |       |  |  |  |      |
|-----|--|--------------------------------------------------------------------------------------------|-------|--|--|--|------|
| S20 |  | <chem>BrC1=CN=C(NC2=CC(NC(N3CCCC3)=O)=CC=C2)N=C1NCCC4=CN=CN4</chem>                        | 0.338 |  |  |  | 6.47 |
| S21 |  | <chem>O=C(C1(C)C)N([C@@H](C)C2=CC=CC(O)=C2)C3=C1C=NC(NC4=CN=CC=C4)=N3</chem>               | 0.270 |  |  |  | 6.56 |
| S22 |  | <chem>BrC1=CN=C(NC3=CC=CC(CN4CCOCC4)=C3)N=C1NCCC2=CN=C=N2</chem>                           | 0.214 |  |  |  | 6.69 |
| S23 |  | <chem>O=C(C1(C)C)N([C@]2([H])C(C=CC=C3NS(C)(=O)=O)=C3CC2)C4=C1C=NC(NC5=CC=CC=C5)=N4</chem> | 0.180 |  |  |  | 6.75 |
| S24 |  | <chem>O=C(N2CCCC2)NC1=CC=CC(NC3=NC=C(Br)C(NC(CCN(C(C4CCC4)=O)=N3)=C1</chem>                | 0.072 |  |  |  | 7.14 |
| S25 |  | <chem>O=C(C3CCCC3)NCCCN(C1=NC(NC4=CC=CC(CN5CCOCC5)=C4)=NC=C1C2C=C2</chem>                  | 0.041 |  |  |  | 7.39 |

|     |                                                                                     |                                                                                                                        |         |  |  |  |      |
|-----|-------------------------------------------------------------------------------------|------------------------------------------------------------------------------------------------------------------------|---------|--|--|--|------|
| S26 | 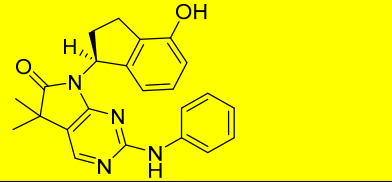   | <chem>O=C(C1(C)C)N([C@]2([H])C(C=CC=C3O)=C3CC2)C4=C1C=NC(NC5=CC=CC=C5)=N4</chem>                                       | 0.021   |  |  |  | 7.68 |
| S27 |    | <chem>O=C(CCCC(NCC5=CC=C(COC6=NC(N)=NC7=C6N=CN7)C=C5)=O)NCCCNC1=CC(NC2=NNC(C4CC4)=C2)=NC(NC3=CC=C(CC#N)C=C3)=N1</chem> | 0.021   |  |  |  | 7.68 |
| S28 |    | <chem>O=C(N2CCCC2)NC1=CC=CC(NC3=NC=C(I)C(NCCNC(C4=CC=CS4)=O)=N3)=C1</chem>                                             | 0.019   |  |  |  | 7.72 |
| S29 |   | <chem>CC(C(N1[C@H]2CCCC3=C2C=CC=C3O)=O)(C)C(C1=N4)=CN=C4NC5=CC=CC(CN6CCCC6)=C5</chem>                                  | 0.002   |  |  |  | 8.70 |
| S30 |  | <chem>CN1CCC2=CC(NC3=NC=C(C(F)(F)F)C(NCC4=NNC=C4)=N3)=CC=C2C1</chem>                                                   | 0.00201 |  |  |  | 8.7  |

The range of activity (FA range) is discriminated with different colors.

Formal activity (FA) descriptor of the inhibiting action, calculated according to the data provided [1-13], as follows:

- a)  $FA = pIC_{50}$
- b)  $FA = pK_d$
- c)  $FA = p(\text{the given concentration}/0.02 \times \% \text{inhibition})$

**Table S2.** Selected ADMET properties calculated with pkCSM software (<http://biosig.unimelb.edu.au/pkcsim/prediction>) [14] for the most active kinase inhibitors fitted in pharmacophore features of the 5-HT<sub>6</sub>R ligands

| Cpd | Structure                                                                           | Absorption                       |                                        | Distribution                  | Toxicity         |                                                          |
|-----|-------------------------------------------------------------------------------------|----------------------------------|----------------------------------------|-------------------------------|------------------|----------------------------------------------------------|
|     |                                                                                     | <sup>1</sup> Caco-2 permeability | <sup>2</sup> Intestinal absorption [%] | <sup>3</sup> CNS Permeability | hERG I inhibitor | <sup>4</sup> Oral Rat Acute Toxicity (LD <sub>50</sub> ) |
| 23  | 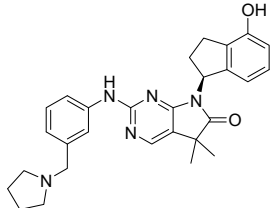   | 0.848                            | 88.83                                  | -2.11                         | No               | 3.207                                                    |
| 24  |    | 0.592                            | 75.89                                  | -2.553                        | No               | 2.344                                                    |
| 25  |    | 0.685                            | 92.87                                  | -1.933                        | No               | 2.628                                                    |
| 31  |   | 1.66                             | 94.376                                 | -1.257                        | No               | 3.069                                                    |
| 32  |  | 1.184                            | 90.671                                 | -1.908                        | No               | 2.802                                                    |
| 44  |  | 1.115                            | 100                                    | -3.317                        | No               | 2.623                                                    |

|      |                                                                                   |       |        |        |    |       |
|------|-----------------------------------------------------------------------------------|-------|--------|--------|----|-------|
| 47   | 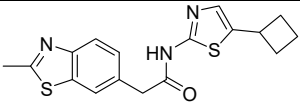 | 1.388 | 89.803 | -1,886 | No | 2.974 |
| Ref. | Donepezil                                                                         | 1.001 | 93.076 | -1.933 | No | 2.886 |

<sup>1</sup>Caco-2 > 0.9 for high permeable compounds; <sup>2</sup>poor intestinal absorption < 30%; <sup>3</sup>CNS permeability: logPS > -2 (high), -3 ≤ logPS ≤ -2 (moderate), logPS < -3 unable; <sup>4</sup>LD<sub>50</sub> [mol/kg b.w.]. <sup>5</sup>Ref.



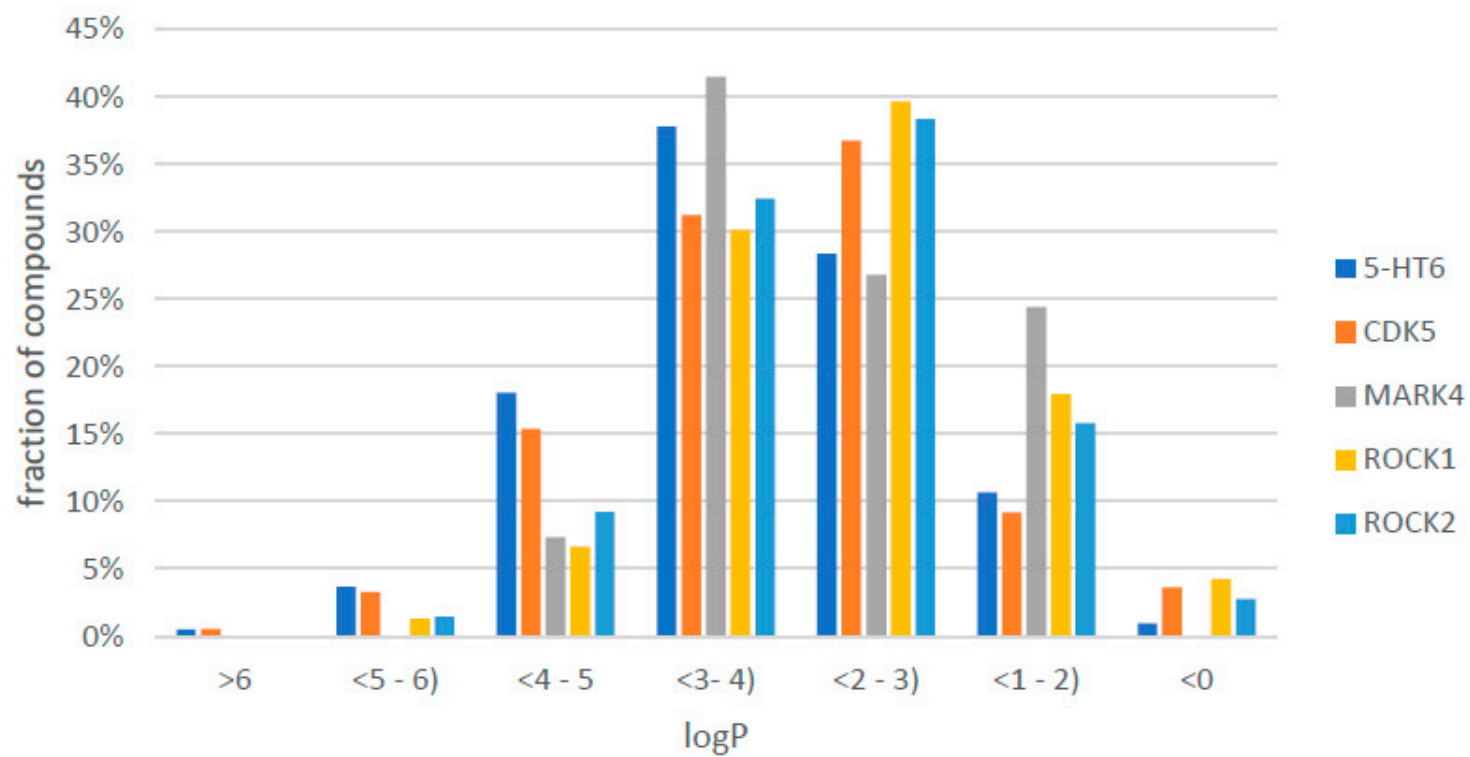

**Figure S1.** Distribution of logP values for the examined ligands.

## References

1. Parveen, I.; Khan, P.; Ali, S.; Hassan, Md.I.; Ahmed, N. Synthesis, Molecular Docking and Inhibition Studies of Novel 3-N-Aryl Substituted-2-Heteroarylchromones Targeting Microtubule Affinity Regulating Kinase 4 Inhibitors. *European Journal of Medicinal Chemistry* **2018**, *159*, 166–177, doi:10.1016/j.ejmech.2018.09.030.
2. Shen, X.; Liu, X.; Wan, S.; Fan, X.; He, H.; Wei, R.; Pu, W.; Peng, Y.; Wang, C. Discovery of Coumarin as Microtubule Affinity-Regulating Kinase 4 Inhibitor That Sensitize Hepatocellular Carcinoma to Paclitaxel. *Frontiers in Chemistry* **2019**, *7*, doi:10.3389/fchem.2019.00366.
3. Aneja, B.; Khan, N.S.; Khan, P.; Queen, A.; Hussain, A.; Rehman, Md.T.; Alajmi, M.F.; El-Seedi, H.R.; Ali, S.; Hassan, Md.I.; et al. Design and Development of Isatin-Triazole Hydrazones as Potential Inhibitors of Microtubule Affinity-Regulating Kinase 4 for the Therapeutic Management of Cell Proliferation and Metastasis. *European Journal of Medicinal Chemistry* **2019**, *163*, 840–852, doi:10.1016/j.ejmech.2018.12.026.
4. Peerzada, M.N.; Khan, P.; Khan, N.S.; Avcilla, F.; Siddiqui, S.M.; Hassan, Md.I.; Azam, A. Design and Development of Small-Molecule Arylaldoxime/5-Nitroimidazole Hybrids as Potent Inhibitors of MARK4: A Promising Approach for Target-Based Cancer Therapy. *ACS Omega* **2020**, *5*, 22759–22771, doi:10.1021/acsomega.0c01703.
5. Voura, M.; Khan, P.; Thysiadis, S.; Katsamakas, S.; Queen, A.; Hasan, G.M.; Ali, S.; Sarli, V.; Hassan, Md.I. Probing the Inhibition of Microtubule Affinity Regulating Kinase 4 by N-Substituted Acridones. *Scientific Reports* **2019**, *9*, 1676, doi:10.1038/s41598-018-38217-8.
6. Ngoei, K.R.W.; Ng, D.C.H.; Gooley, P.R.; Fairlie, D.P.; Stoermer, M.J.; Bogoyevitch, M.A. Identification and Characterization of Bi-Thiazole-2,2'-Diamines as Kinase Inhibitory Scaffolds. *Biochimica et Biophysica Acta (BBA) - Proteins and Proteomics* **2013**, *1834*, 1077–1088, doi:10.1016/j.bbapap.2013.02.001.
7. Szabadkai, I.; Torka, R.; Garamvölgyi, R.; Baska, F.; Gyulavári, P.; Boros, S.; Illyés, E.; Choidas, A.; Ullrich, A.; Órfi, L. Discovery of *N*-[4-(Quinolin-4-Yloxy)Phenyl]Benzenesulfonamides as Novel AXL Kinase Inhibitors. *Journal of Medicinal Chemistry* **2018**, *61*, 6277–6292, doi:10.1021/acs.jmedchem.8b00672.
8. Barile, E.; De, S.K.; Carlson, C.B.; Chen, V.; Knutzen, C.; Riel-Mehan, M.; Yang, L.; Dahl, R.; Chiang, G.; Pellicchia, M. Design, Synthesis, and Structure–Activity Relationships of 3-Ethynyl-1 *H* -Indazoles as Inhibitors of the Phosphatidylinositol 3-Kinase Signaling Pathway. *Journal of Medicinal Chemistry* **2010**, *53*, 8368–8375, doi:10.1021/jm100825h.
9. Li, F.; Liu, Z.; Sun, H.; Li, C.; Wang, W.; Ye, L.; Yan, C.; Tian, J.; Wang, H. PCC0208017, a Novel Small-Molecule Inhibitor of MARK3/MARK4, Suppresses Glioma Progression in Vitro and in Vivo. *Acta Pharmaceutica Sinica B* **2020**, *10*, 289–300, doi:10.1016/j.apsb.2019.09.004.

10. Faisal, M.; Kim, J.H.; Yoo, K.H.; Roh, E.J.; Hong, S.S.; Lee, S.H. Development and Therapeutic Potential of NUAKs Inhibitors. *Journal of Medicinal Chemistry* **2021**, *64*, 2–25, doi:10.1021/acs.jmedchem.0c00533.
11. Katz, J.D.; Haidle, A.; Childers, K.K.; Zabierek, A.A.; Jewell, J.P.; Hou, Y.; Altman, M.D.; Szewczak, A.; Chen, D.; Harsch, A.; et al. Structure Guided Design of a Series of Selective Pyrrolopyrimidinone MARK Inhibitors. *Bioorganic & Medicinal Chemistry Letters* **2017**, *27*, 114–120, doi:10.1016/j.bmcl.2016.08.068.
12. Drewry, D.H.; Annor-Gyamfi, J.K.; Wells, C.I.; Pickett, J.E.; Dederer, V.; Preuss, F.; Mathea, S.; Axtman, A.D. Identification of Pyrimidine-Based Lead Compounds for Understudied Kinases Implicated in Driving Neurodegeneration. *Journal of Medicinal Chemistry* **2022**, *65*, 1313–1328, doi:10.1021/acs.jmedchem.1c00440.
13. Gower, C.M.; Thomas, J.R.; Harrington, E.; Murphy, J.; Chang, M.E.K.; Cornella-Taracido, I.; Jain, R.K.; Schirle, M.; Maly, D.J. Conversion of a Single Polypharmacological Agent into Selective Bivalent Inhibitors of Intracellular Kinase Activity. *ACS Chemical Biology* **2016**, *11*, 121–131, doi:10.1021/acscchembio.5b00847.
14. Pires, D.; Blundell, T.; Ascher, D. pkCSM: Predicting Small-Molecule Pharmacokinetic and Toxicity Properties Using Graph-Based Signatures. . *Journal of Medicinal Chemistry* **2015**, *58*, 4066–72, doi: 10.1021/acs.jmedchem.5b00104
